# Supplementary material for: Synthesis of carbazole-based microporous polymer networks via an oxidative coupling mediated self-assembly strategy: from morphology regulation to application analysis
Source: Royal Society of Chemistry journal article supplement (doi:10.1039/c8py01491d), 2019-01-01

## Supporting Information

### Synthesis of Carbazole-based Microporous Polymer Networks via Oxidative Coupling Mediated Self-assembly Strategy: From Morphology Regulation to Application Analysis

Yang Xu, Tianqi Wang, Buyin Shi, Shengguang Gao, Guojie Meng and Kun Huang\*

Department: School of Chemistry and Molecular Engineering.

Institution: East China Normal University

Address: 500N, Dongchuan Road, Shanghai, 200241, P. R. China.

E-mail: [khuang@chem.ecnu.edu.cn](mailto:khuang@chem.ecnu.edu.cn)

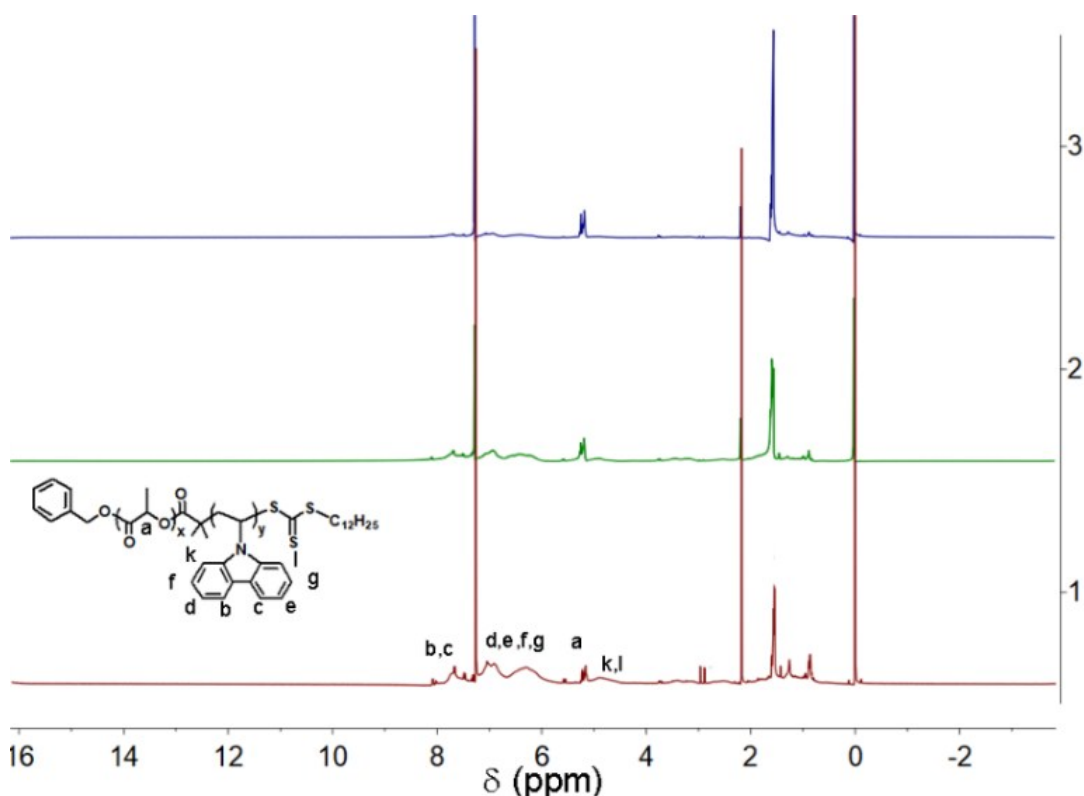

**Fig. S1**  $^1\text{H}$  NMR characterization of  $\text{PLA}_x\text{-b-PNVC}_y$ : (1)  $x=184$ ,  $y=400$ ; (2)  $x=184$ ,  $y=190$ ; (3)  $x=184$ ,  $y=70$ .

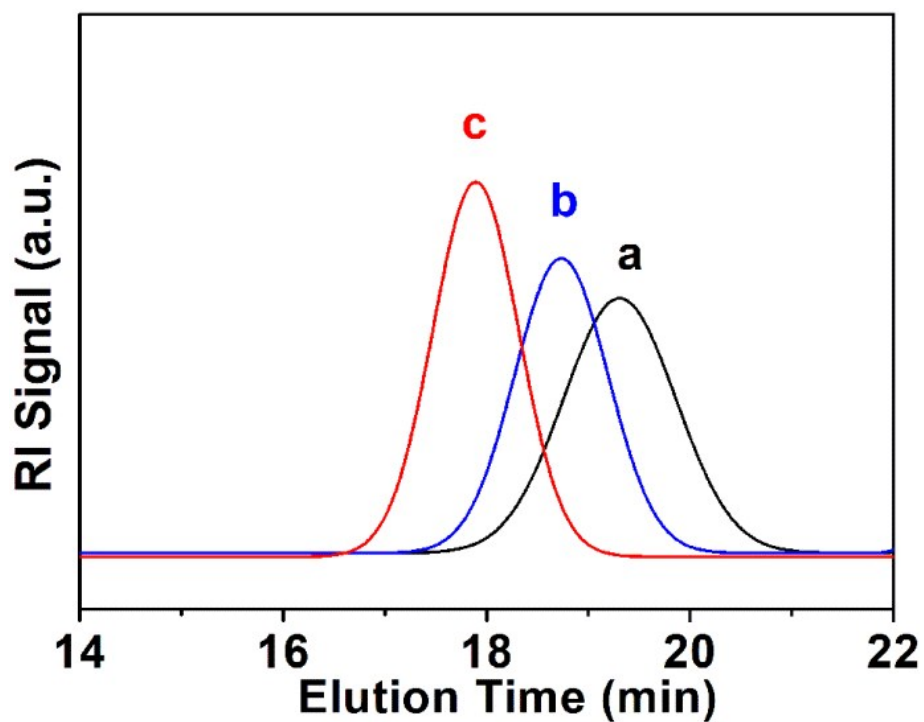

**Fig. S2** GPC traces recorded for (a) PLA<sub>184</sub>-b-PNVC<sub>70</sub>, (b) PLA<sub>184</sub>-b-PNVC<sub>190</sub> and (c) PLA<sub>184</sub>-b-PNVC<sub>400</sub>.

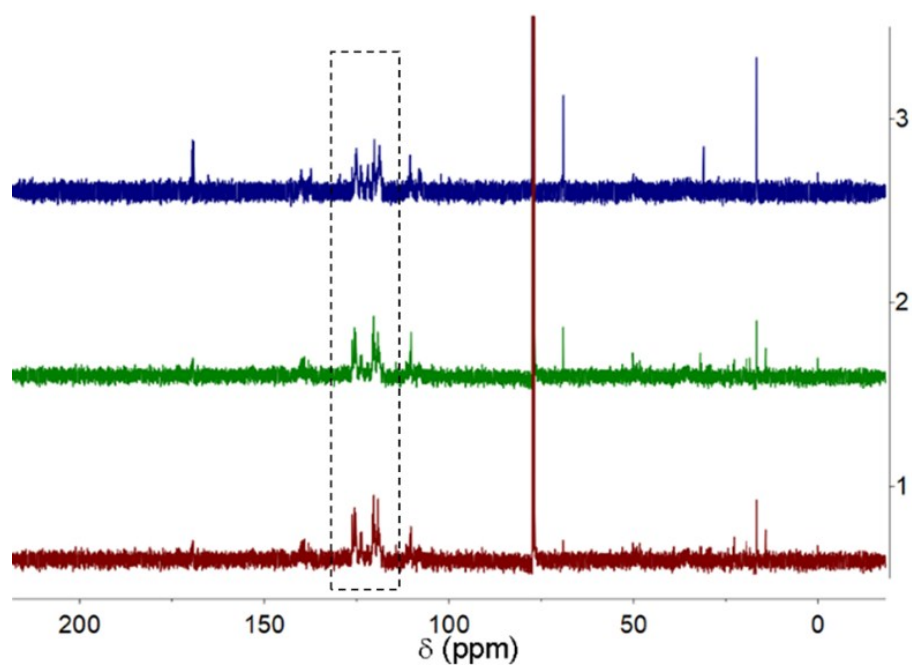

**Fig. S3** <sup>13</sup>C NMR characterization of PLA<sub>x</sub>-b-PNVC<sub>y</sub>: (1) x=184, y=400; (2) x=184, y=190; (3) x=184, y=70.

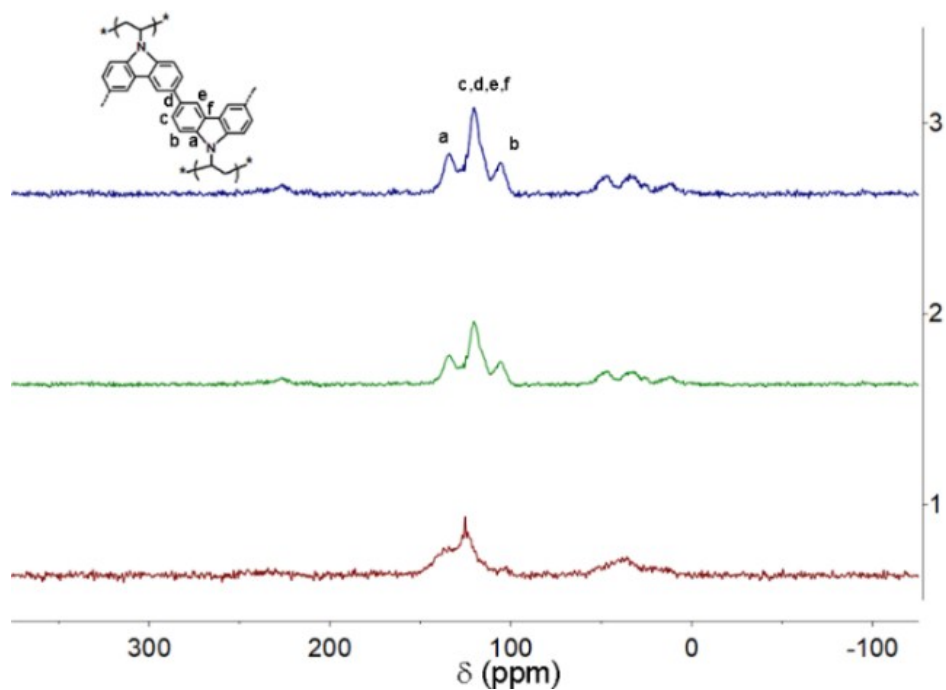

**Fig. S4**  $^{13}\text{C}$  CP/MAS NMR characterization of (1) S-C-MPNs, (2) B-C-MPNs and (3) H-C-MPNs, respectively.

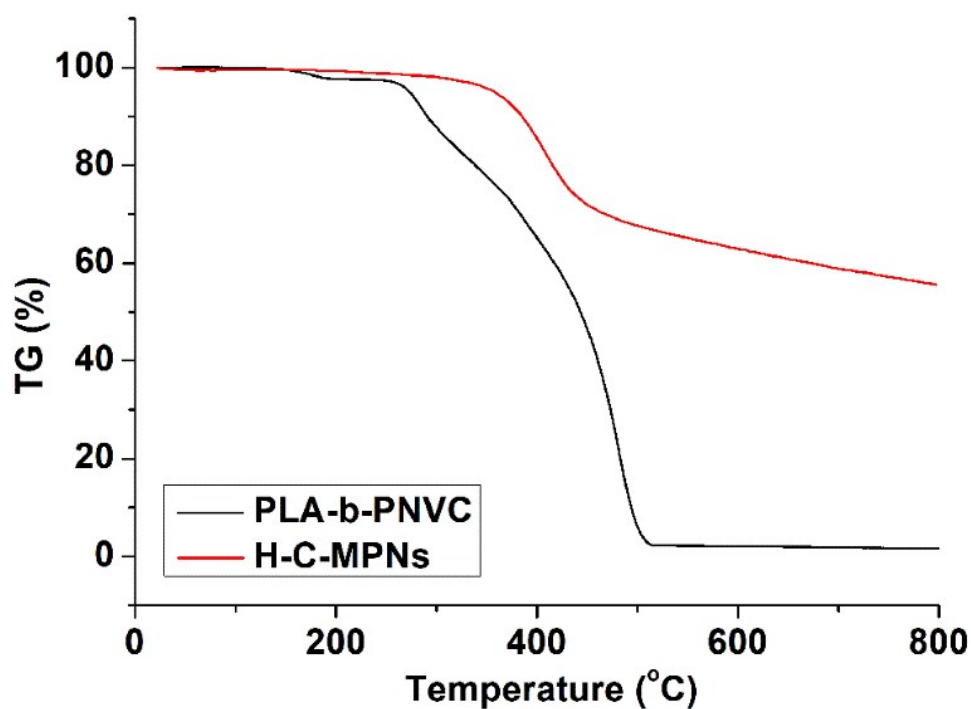

**Fig. S5** TGA curves of PLA-b-PNVC ( $x=184$ ,  $y=190$ ) and H-C-MPNs.

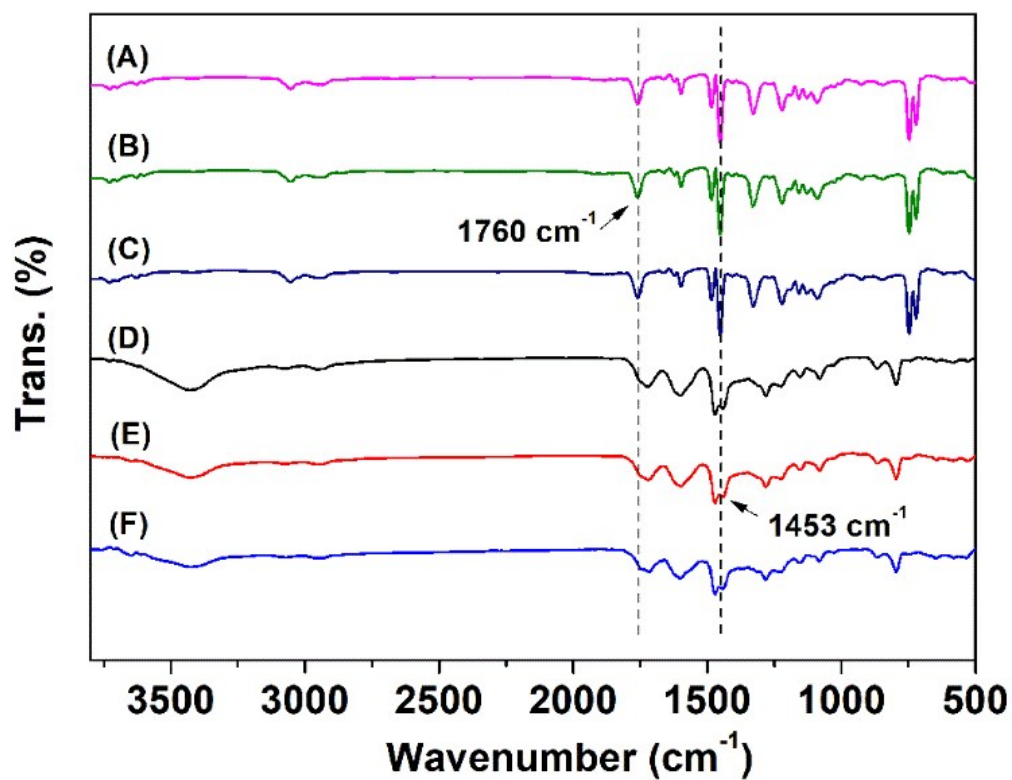

**Fig. S6** FT-IR spectra of (A)  $\text{PLA}_{184}\text{-b-PNVC}_{70}$ , (B)  $\text{PLA}_{184}\text{-b-PNVC}_{190}$ , (C)  $\text{PLA}_{184}\text{-b-PNVC}_{400}$  polymer and the corresponding (D) S-C-MPNs, (E) B-C-MPNs and (F) H-C-MPNs, respectively.

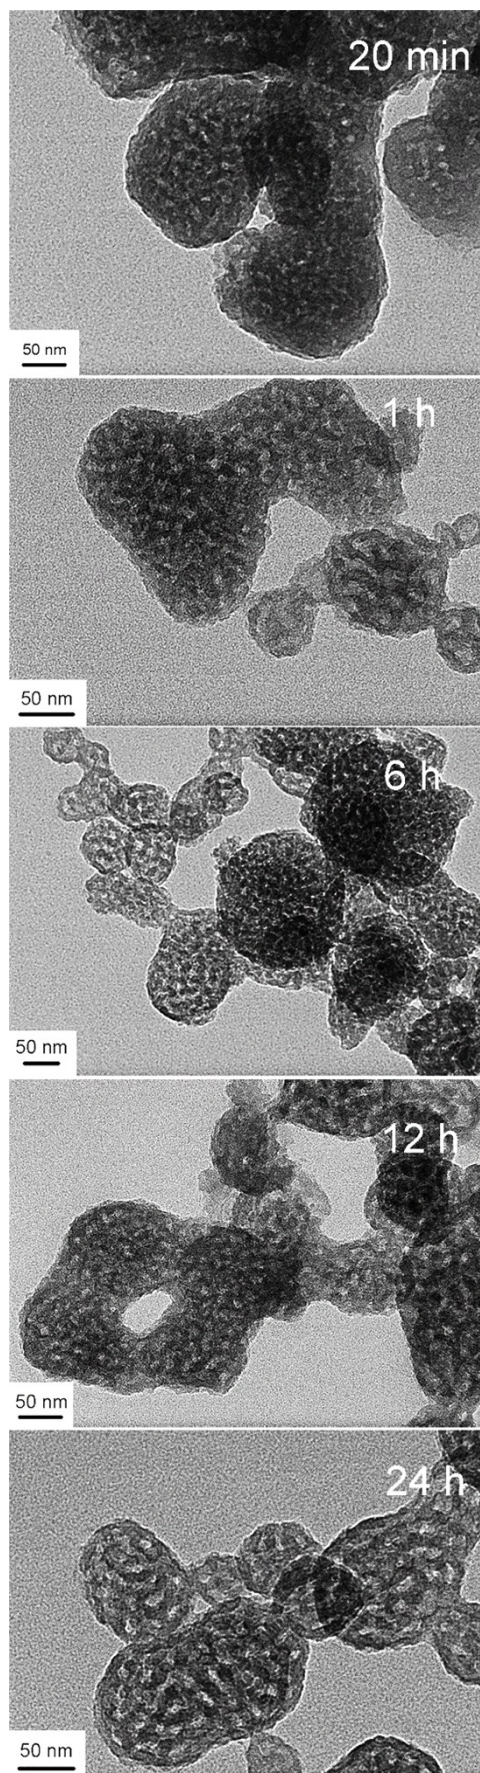

**Fig. S7** TEM images of B-C-MPNs with different oxidative coupling times.



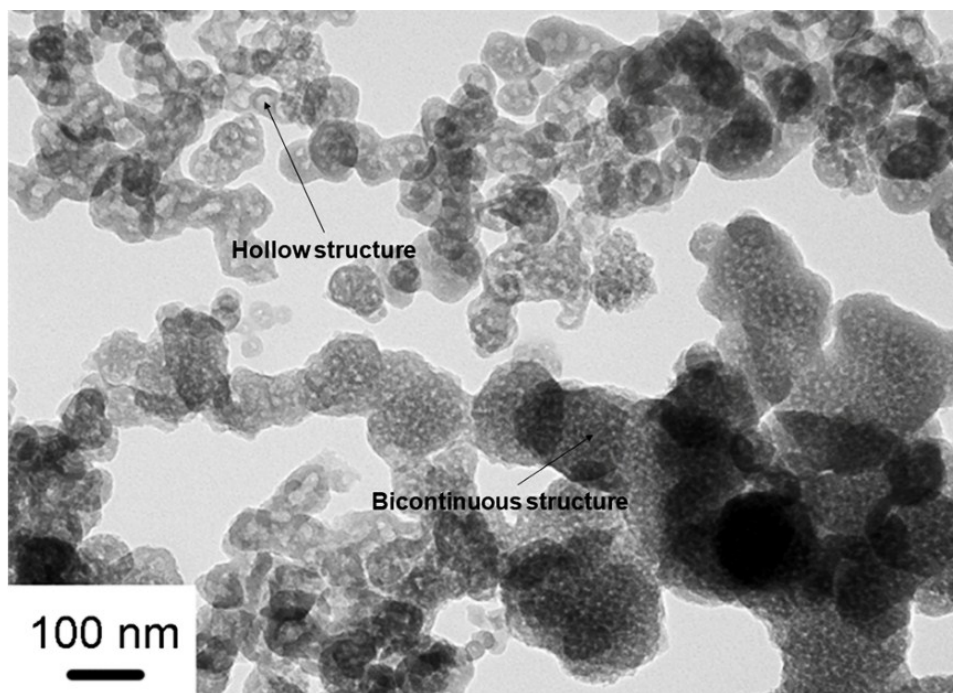

**Fig. S8** TEM image of the sample from PLA<sub>184</sub>-b-PNVC<sub>300</sub> precursor.

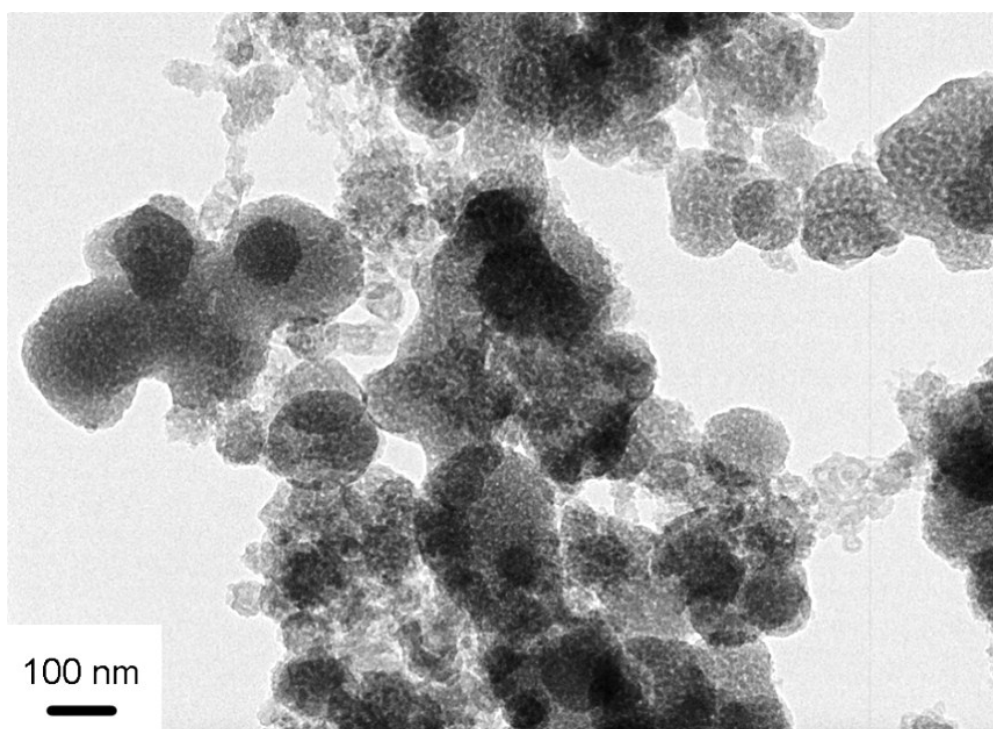

**Fig. S9** TEM image of the sample from PLA<sub>90</sub>-b-PNVC<sub>95</sub> precursor.

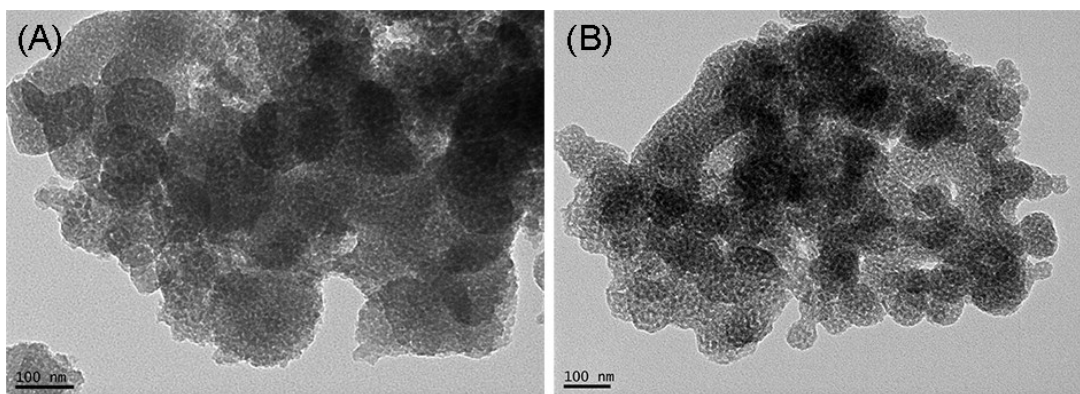

**Fig. S10** TEM images of the obtained oxidative coupling polymers from different molar ratio of  $\text{FeCl}_3$  to carbazole unit of  $\text{PLA}_{184}\text{-b-PNVC}_{184}$ : (A) ratio = 2; (B) ratio = 8.

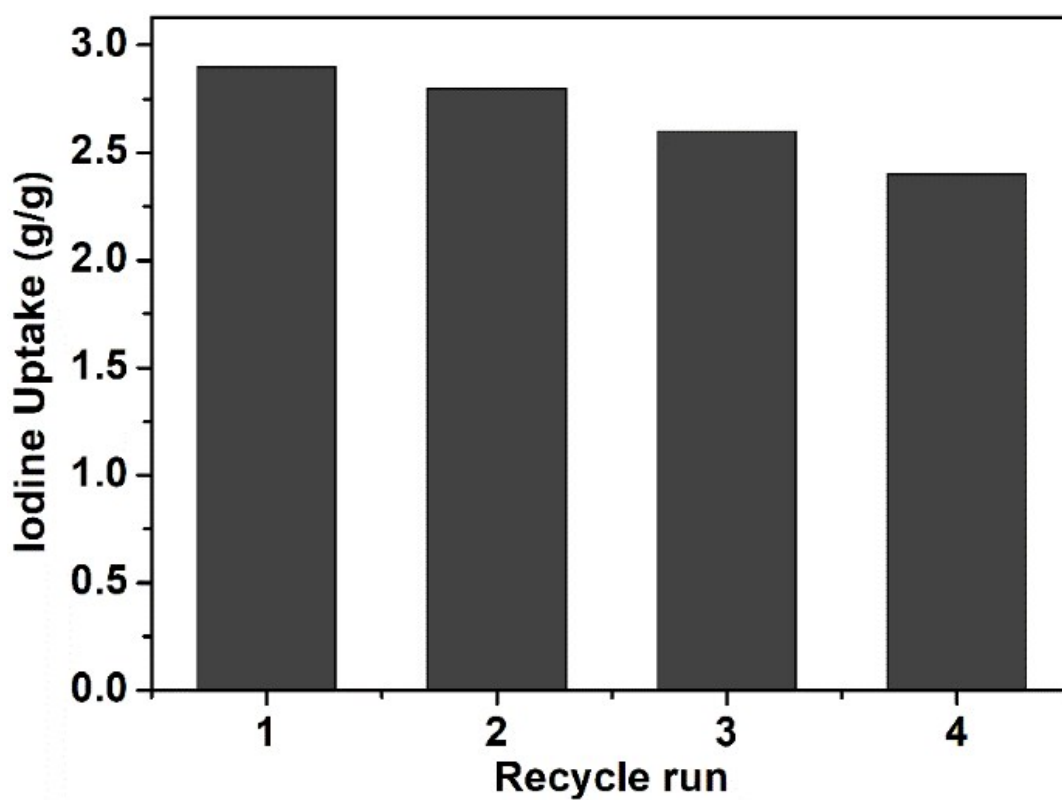

**Fig. S11** Reusability of H-C-MPNs for iodine adsorption.

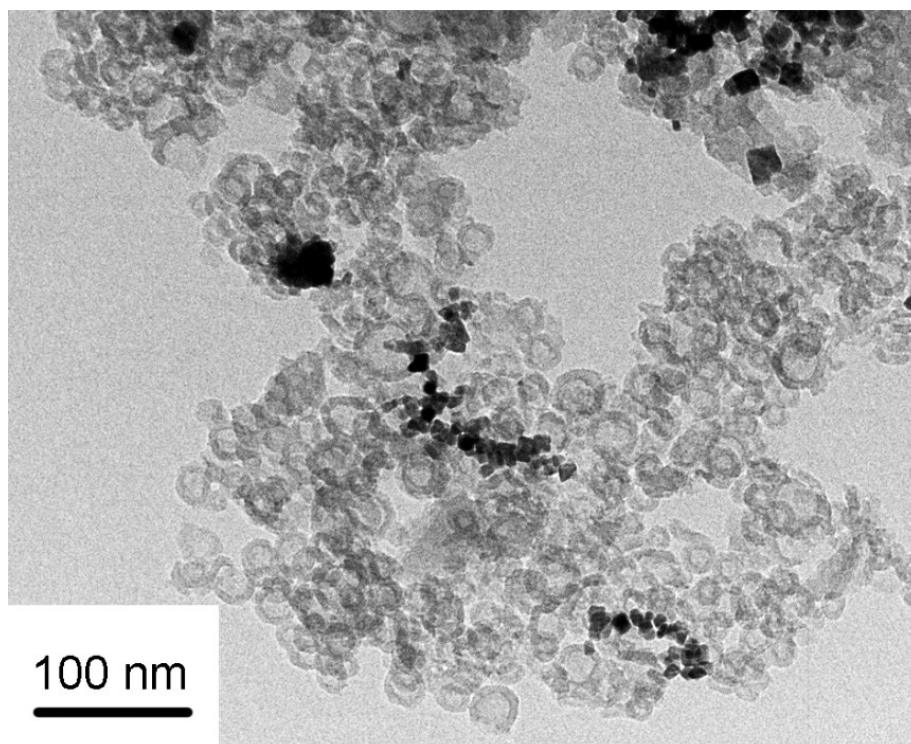

**Fig. S12** TEM image of Pd@H-C-MPNs.

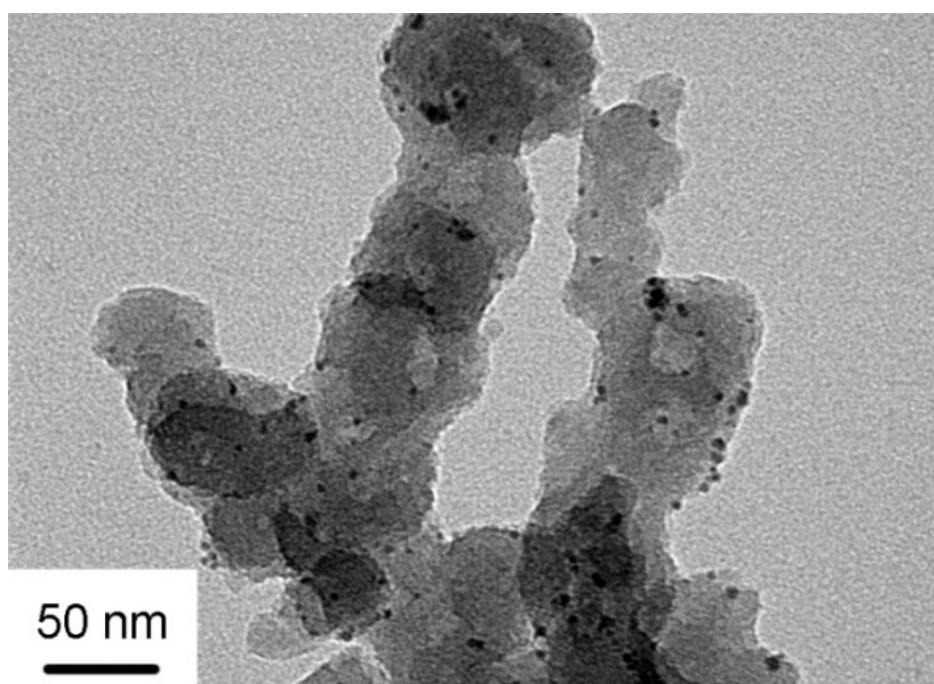

**Fig. S13** TEM image of Pd@H-N-PCNs after recycle used.



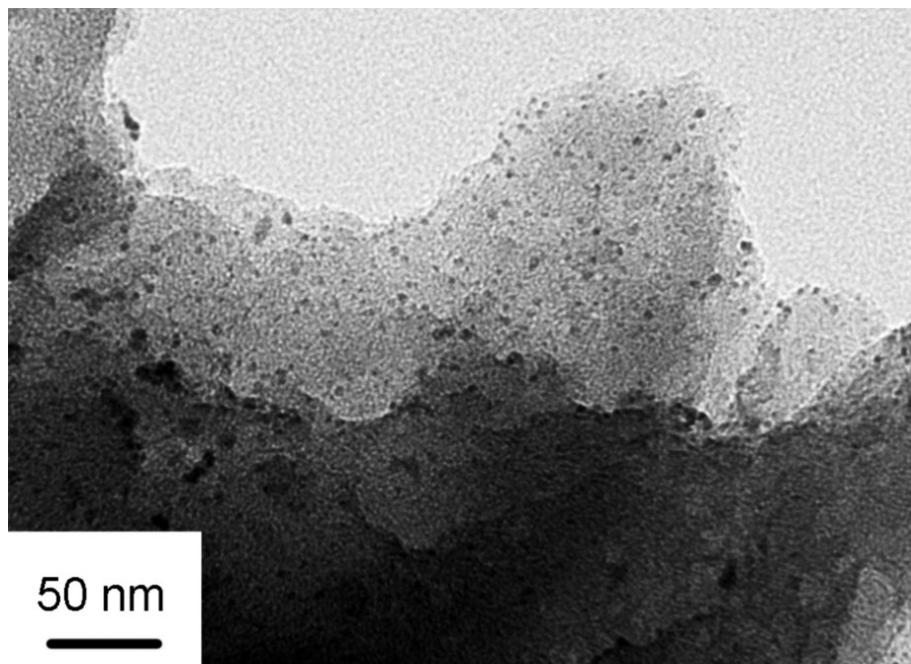

**Fig. S14** TEM image of Pd@S-N-PCNs.

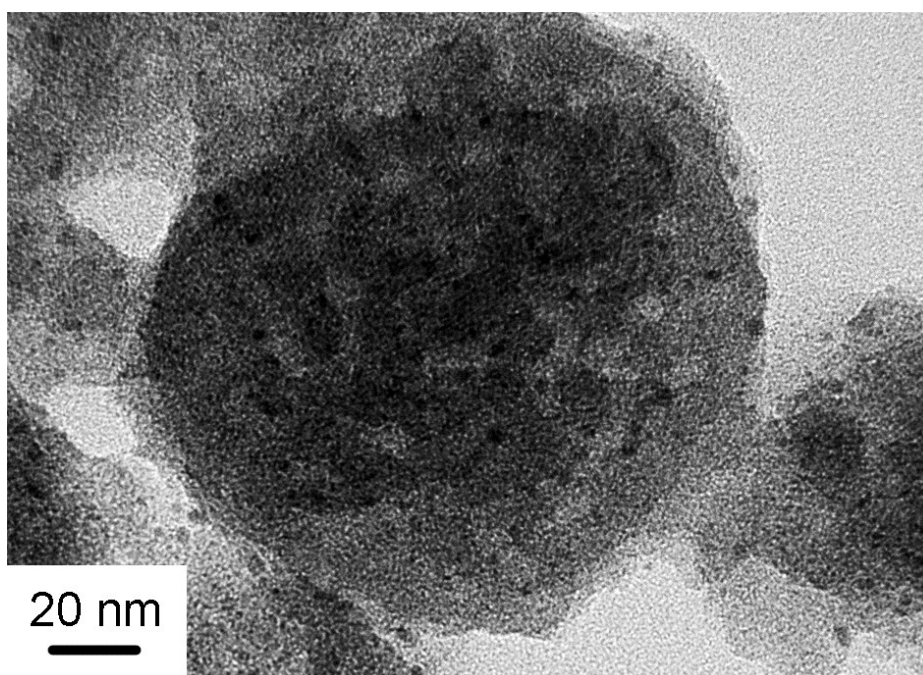

**Fig. S15** TEM image of Pd@B-N-PCNs.

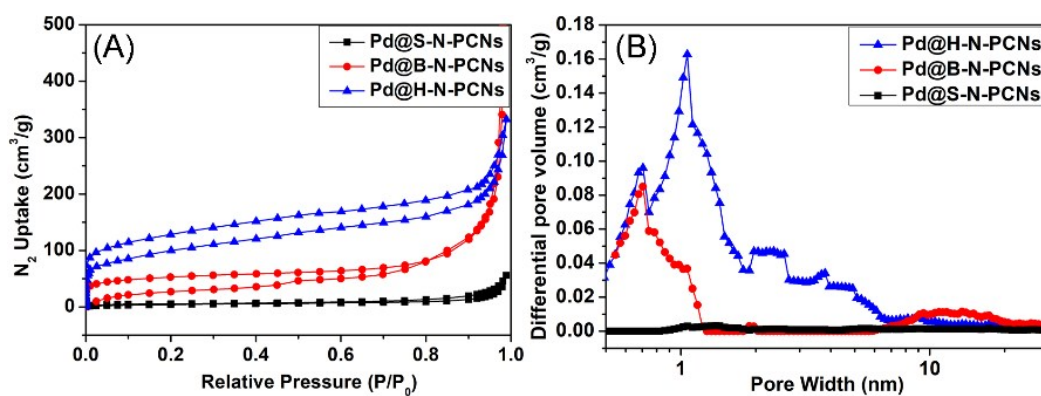

**Fig. S16** (A)  $N_2$  adsorption/desorption isotherms and (B) NLDFT pore size distribution of Pd@H-N-PCNs, Pd@B-N-PCNs and Pd@S-N-PCNs, respectively.

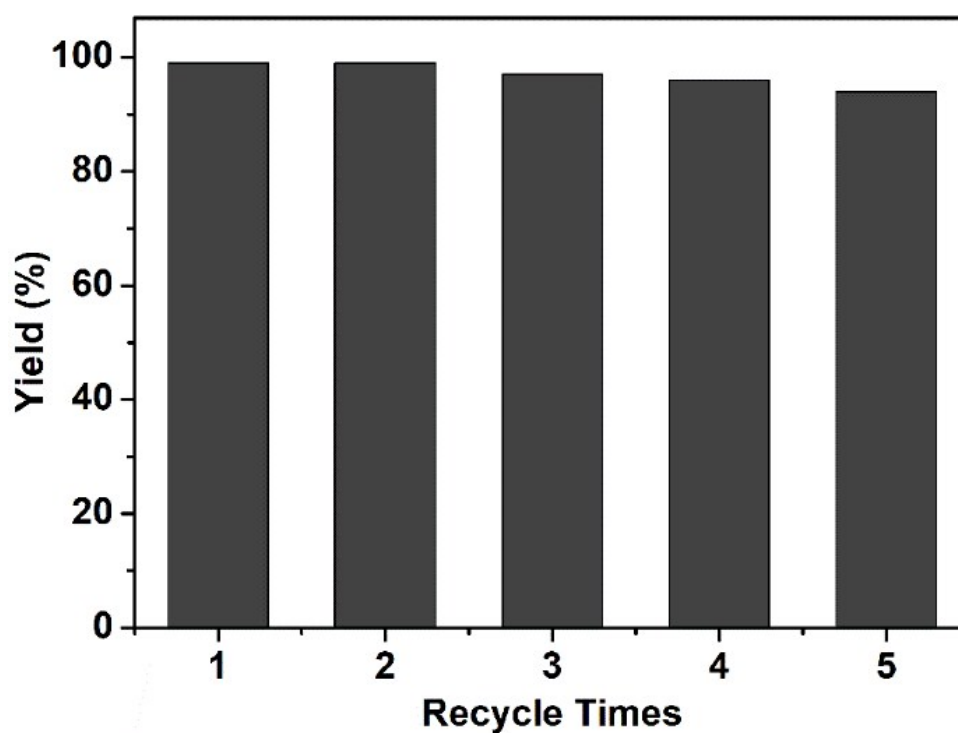

**Fig. S17** Recycling tests of Pd@H-N-PCNs for quinolin selective hydrogenation.

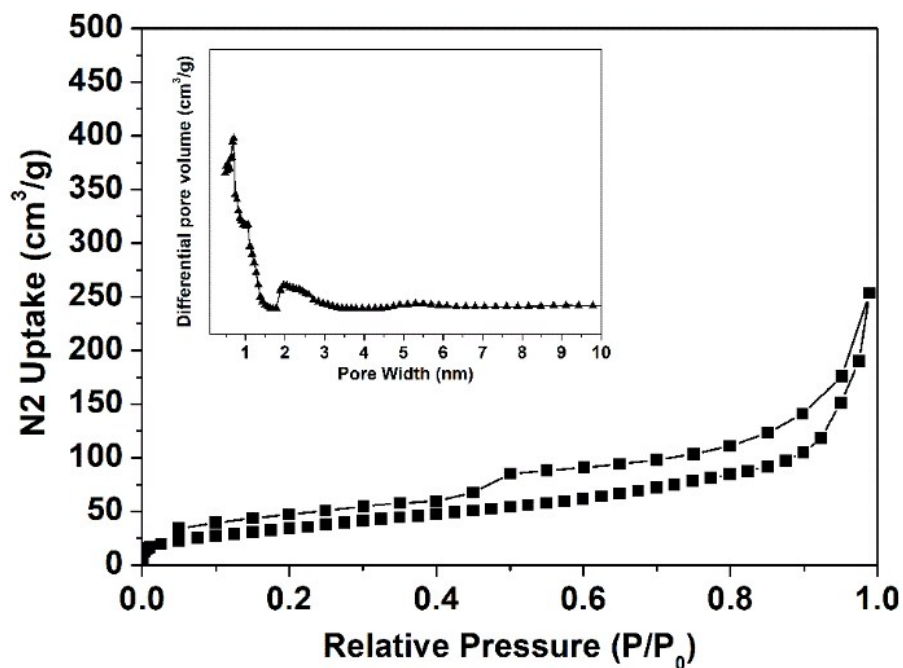

**Fig. S18** N<sub>2</sub> adsorption/desorption isotherms and NLDFT pore size distribution of Pd@H-N-PCNs after recycle used.

**Table S1.** Elemental analysis of various materials.

| Sample                                    | Content (%) |       |      |       |            |
|-------------------------------------------|-------------|-------|------|-------|------------|
|                                           | N           | C     | H    | C:N   | C:N by NMR |
| PLA <sub>184</sub> -b-PNVC <sub>70</sub>  | 3.49        | 62.20 | 5.78 | 17.82 | 17.71      |
| PLA <sub>184</sub> -b-PNVC <sub>190</sub> | 5.15        | 78.70 | 5.46 | 15.28 | 14.49      |
| PLA <sub>184</sub> -b-PNVC <sub>400</sub> | 6.01        | 81.58 | 5.15 | 13.57 | 13.18      |
| S-C-MPNs                                  | 8.78        | 82.31 | 7.12 | 9.37  | --         |
| B-C-MPNs                                  | 8.65        | 84.73 | 6.99 | 9.80  | --         |
| H-C-MPNs                                  | 8.46        | 85.66 | 5.87 | 10.13 | --         |
| S-N-PCNs                                  | 5.32        | 92.02 | --   | 17.30 | --         |
| B-N-PCNs                                  | 5.05        | 90.36 | --   | 17.89 | --         |
| H-N-PCNs                                  | 5.10        | 90.15 | --   | 17.68 | --         |

**Table S2.** Comparison of the iodine adsorption performance of selected outstanding absorbents reported in the literature.

| <b>Absorbents</b> | <b>T (°C)</b> | <b>Iodine (g/g)</b> | <b>Ref.</b>                                                        |
|-------------------|---------------|---------------------|--------------------------------------------------------------------|
| <b>NiP-CMPs</b>   | 77            | 2.02                | <i>Chem. Commun.</i> <b>2014</b> , 50, 8495-8498.                  |
| <b>PAF-1</b>      | 25            | 1.86                | <i>J. Mater. Chem. A</i> , <b>2014</b> , 2, 7179-7187.             |
| <b>CMPN-3</b>     | 70.3          | 2.08                | <i>J. Mater. Chem. A</i> , <b>2015</b> , 3, 87-91.                 |
| <b>PAF-24</b>     | 75            | 2.76                | <i>Angew. Chem. Int. Ed</i> , <b>2015</b> , 54, 12733-12737.       |
| <b>Azo-Trip</b>   | 77            | 2.33                | <i>Polym. Chem.</i> , <b>2016</b> , 7, 643-647.                    |
| <b>SCMP-2</b>     | 80            | 2.22                | <i>ACS Appl. Mater. Interfaces</i> , <b>2016</b> , 8, 21063-21069. |
| <b>NTP</b>        | 75            | 1.80                | <i>ACS Macro Lett.</i> , <b>2016</b> , 5, 1039-1043.               |
| <b>AzoPPN</b>     | 77            | 2.90                | <i>Chem. Eur. J.</i> , <b>2016</b> , 22(33), 11863-11868.          |
| <b>NCMP1</b>      | 85            | 2.15                | <i>ACS Appl. Mater. Interfaces</i> , <b>2017</b> , 9, 1944-8244.   |
| <b>NRPP-2</b>     | 80            | 2.22                | <i>ACS Appl. Mater. Interfaces</i> , <b>2018</b> , 10,             |

|                    |           |             |                                                          |
|--------------------|-----------|-------------|----------------------------------------------------------|
|                    |           |             | 16049-16058.                                             |
| <b>MFM-300(Sc)</b> | 80        | 1.54        | <i>J. Am. Chem. Soc.</i> <b>2017</b> , 139, 16289-16296. |
| <b>HCNPs</b>       | 80        | 3.36        | <i>Macromolecules</i> , <b>2016</b> , 49, 6322-6333.     |
| <b>Cu-BTC</b>      | 75        | 1.75        | <i>Chem. Mater.</i> <b>2013</b> , 25, 2591-2596.         |
| <b>H-C-MPNs</b>    | <b>75</b> | <b>2.90</b> | <b>This work</b>                                         |

**Table S3.** Catalytic activities comparison for the selective hydrogenation of nitrobenzene catalyzed by selected outstanding heterogeneous catalysts.

| Catalysts                                                            | Hydrogen sources        | Reaction conditions                         | Time    | Recycle runs | Yield (%) | TOF (h <sup>-1</sup> ) | References.                                  |
|----------------------------------------------------------------------|-------------------------|---------------------------------------------|---------|--------------|-----------|------------------------|----------------------------------------------|
| Pd/H <sub>2</sub> N-SiO <sub>2</sub> /Fe <sub>2</sub> O <sub>3</sub> | 1 atm of H <sub>2</sub> | 2-propanol, Pd (2 μmol)<br>room temperature | 90 min  | 14 (87%)     | 99        | --                     | <i>Chem. Mater.</i> , <b>2006</b> , 18, 2459 |
| Pd/HS-SiO <sub>2</sub> /Fe <sub>2</sub> O <sub>3</sub>               | 1 atm of H <sub>2</sub> | 2-propanol, Pd (2 μmol)<br>room temperature | 290 min | 14 (76%)     | 99        | --                     | <i>Chem. Mater.</i> , <b>2006</b> , 18, 2459 |
| SiO <sub>2</sub> -BisILs[PF <sub>6</sub> ]-Pd <sup>0</sup>           | 1 atm of H <sub>2</sub> | Pd (5 μmol)<br>room temperature             | 8.5 h   | 15           | 100       | --                     | <i>ACS Catal.</i> , <b>2011</b> , 1, 657.    |
| Pd/PEG4000                                                           | 1 atm of H <sub>2</sub> | Catalyst (100 mg)<br>room temperature       | 180 min | 10 (67%)     | 100       | 83                     | <i>J. Catal.</i> , <b>2012</b> , 286, 184.   |
| Co@Pd/NC                                                             | 1 atm of H <sub>2</sub> | EtOAc, Pd (0.2 mol%)                        | 45 min  | 7 (~80%)     | 98        | --                     | <i>ACS Catal.</i> , <b>2015</b> , 5, 5264    |



|                                         |                                      |                                               |         |    |      |       |                                                     |
|-----------------------------------------|--------------------------------------|-----------------------------------------------|---------|----|------|-------|-----------------------------------------------------|
|                                         |                                      | room temperature                              |         |    |      |       |                                                     |
| Pt/ZSM-5                                | 1.0 MPa H <sub>2</sub>               | EtOH, Catalyst (100 mg)<br>80 °C              | 60      | -- | 100  | --    | <i>ACS Catal.</i> , <b>2015</b> , 5, 6893           |
| Ru@C <sub>60</sub>                      | 30 bar of H <sub>2</sub>             | EtOH, Catalyst (5 mg)<br>80 °C                | 4 h     | -- | 90   | 55.7  | <i>ACS Catal.</i> , <b>2016</b> , 6, 6018           |
| Pd-H-MOF-5                              | 1 atm of H <sub>2</sub>              | EtOH, Catalyst (0.01 equiv)<br>60 °C          | 1.5 h   | -- | 95.6 | --    | <i>Chem. Sci.</i> , <b>2016</b> , 7, 7101           |
| Pd/TiO <sub>2</sub> -NH <sub>3</sub>    | 0.25 vol % NB, 2.5 vol %, He balance | Catalyst (10 mg)<br>200 °C                    | 240 min | -- | 100  | 876   | <i>ACS Catal.</i> , <b>2017</b> , 7, 1197           |
| Co-Mo-S                                 | 11 bar of H <sub>2</sub>             | Toluene, Catalyst (4.9 mg)<br>150 °C          | 7 h     | 7  | 99   | --    | <i>ACS Catal.</i> , <b>2017</b> , 7, 2698           |
| Zr <sub>12</sub> -TPDC-Co               | 40 bar of H <sub>2</sub>             | Toluene, Catalyst (0.5 mg)<br>110 °C          | 42 h    | 8  | 100  | --    | <i>J. Am. Chem. Soc.</i> , <b>2017</b> , 139, 7004  |
| LaCu <sub>0.67</sub> Si <sub>1.33</sub> | 3.0 MPa H <sub>2</sub>               | 2-propanol, Catalyst (50 mg)<br>120 °C        | 9 h     | 10 | 100  | --    | <i>J. Am. Chem. Soc.</i> , <b>2017</b> , 139, 17089 |
| Pd/PPh <sub>3</sub> @FDU-12             | 10 bar of H <sub>2</sub>             | EtOH, Pd (8 x 10 <sup>-3</sup> mmol)<br>60 °C | 60 min  | 5  | 100  | 11020 | <i>ACS Catal.</i> , <b>2018</b> , 8, 6476           |

|                                                  |                             |                                                                       |           |             |     |     |                                                      |
|--------------------------------------------------|-----------------------------|-----------------------------------------------------------------------|-----------|-------------|-----|-----|------------------------------------------------------|
| (MeCp)PtH/Zn/SiO <sub>2</sub>                    | 50 psi H <sub>2</sub>       | Toluene,<br>Pd (0.04 mol%)<br>40 °C                                   | 24 h      | 3           | 99  | --  | <i>J. Am. Chem. Soc.</i> , <b>2018</b> , 140, 3940   |
| Fe <sub>3</sub> O <sub>4</sub> @N-C@Pd<br>Y-S(B) | NaBH <sub>4</sub>           | H <sub>2</sub> O:EtOH<br>(1:1),<br>Pd (1 mol%)<br>room<br>temperature | 45<br>min | 10<br>(94%) | 81  | 108 | <i>J. Catal.</i> , <b>2018</b> , 364, 69.            |
| Co-SiCN                                          | 5.0 MPa H <sub>2</sub>      | H <sub>2</sub> O:EtOH<br>(4:1),<br>Co (0.024<br>mmol)<br>110 °C       | 15 h      | 5           | 99  | --  | <i>Angew. Chem. Int. Ed.</i> <b>2016</b> , 55, 15175 |
| Pd/C@HCS-H <sub>2</sub> O <sub>2</sub>           | 10 bar of<br>H <sub>2</sub> | Cyclohexane,<br>Catalyst (50<br>mg)<br>120 °C                         | 30<br>min | 6 (47%)     | 100 | --  | <i>Chem. Mater.</i> , <b>2018</b> , 30, 2483         |
| Pd@HBPs-1                                        | 1 atm of H <sub>2</sub>     | EtOH,<br>Pd (0.6 mol%)<br>room<br>temperature                         | 60<br>min | 8           | 100 | 167 | <i>Macromolecules</i> <b>2017</b> , 50, 9626         |
| Pd@H-N-PCNs                                      | 1 atm of H <sub>2</sub>     | EtOH,<br>Pd (0.0012<br>mmol)<br>room<br>temperature                   | 30<br>min | 15<br>(92%) | 100 | 833 | <i>This work</i>                                     |

**<sup>1</sup>H NMR data for compounds of the hydrogenation products.**

### Aniline

$^1\text{H NMR}$  (500 MHz,  $\text{CDCl}_3$ ):  $\delta$  7.19 (t,  $J = 8.0$  Hz, 2H); 6.83 (t,  $J = 7.5$  Hz, 1H); 6.73 (d,  $J = 7.5$  Hz, 2H); 3.66 (s, 2H). Isolated yield= 99%.

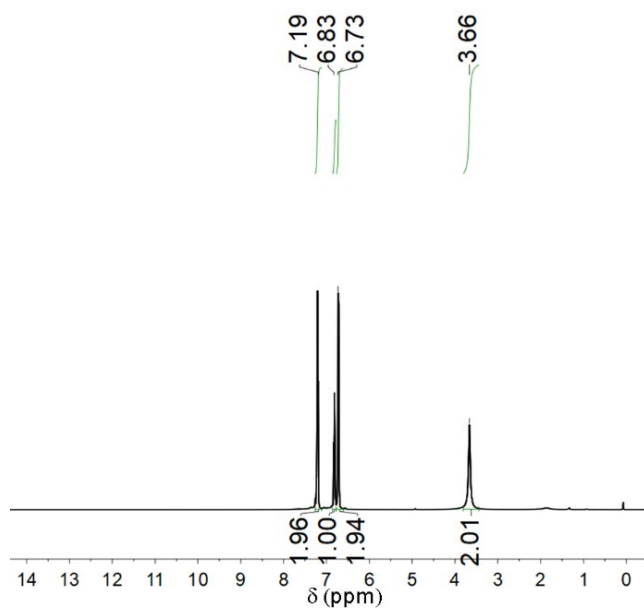

### p-Toluidine:

$^1\text{H NMR}$  (500 MHz,  $\text{CDCl}_3$ ):  $\delta$  6.96 (d,  $J = 8.0$  Hz, 2H), 6.61 (d,  $J = 8.0$  Hz, 2H), 3.48 (w, 2H), 2.24 (s, 3H). Isolated yield= 99%.

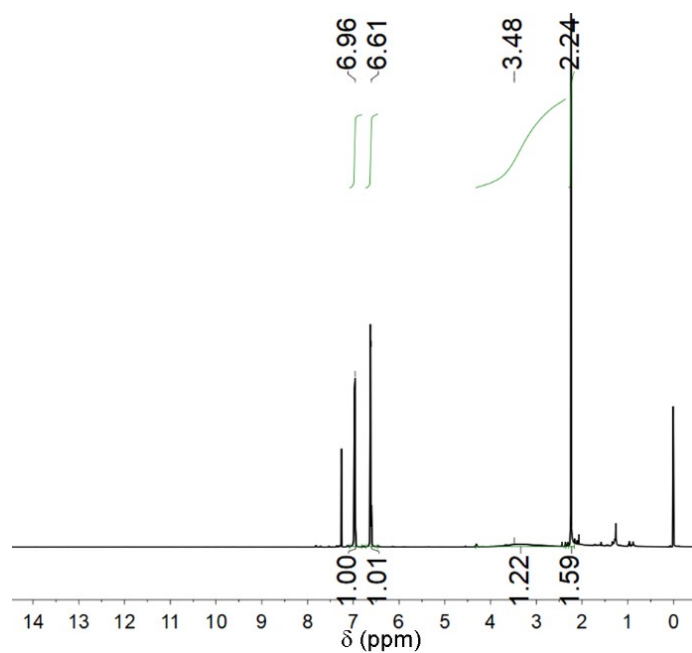

### 4-Chloroaniline

**<sup>1</sup>H NMR (500 MHz, CDCl<sub>3</sub>):** δ 7.10 (d, J = 6.5 Hz, 2H); 6.60 (d, J = 6.5 Hz, 2H); 3.65 (s, 2H).

Isolated yield= 99%.

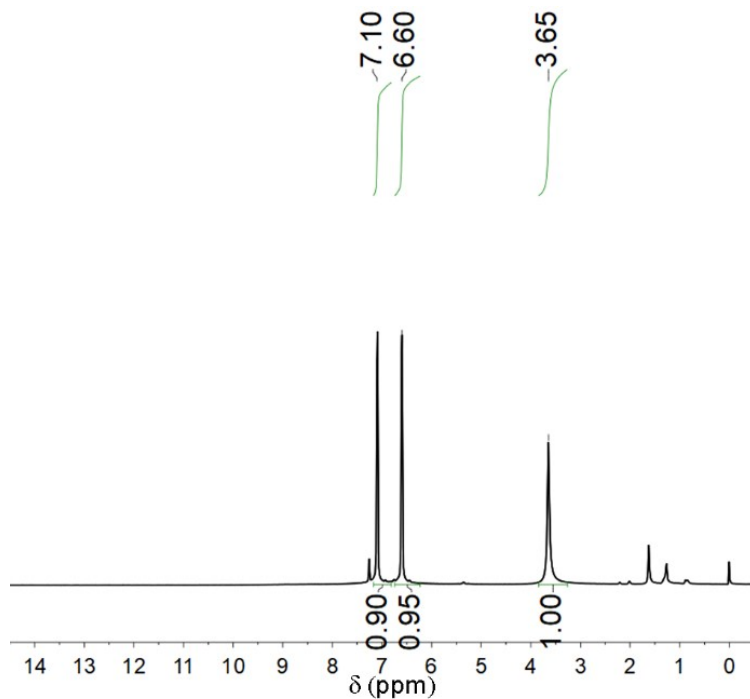

### 2-Chloroaniline

**<sup>1</sup>H NMR (500 MHz, CDCl<sub>3</sub>):** δ 7.15 (m, 2H); 6.77 (d, J = 7.5 Hz, 2H); 4.10 (bs, 2H). Isolated yield= 90%.

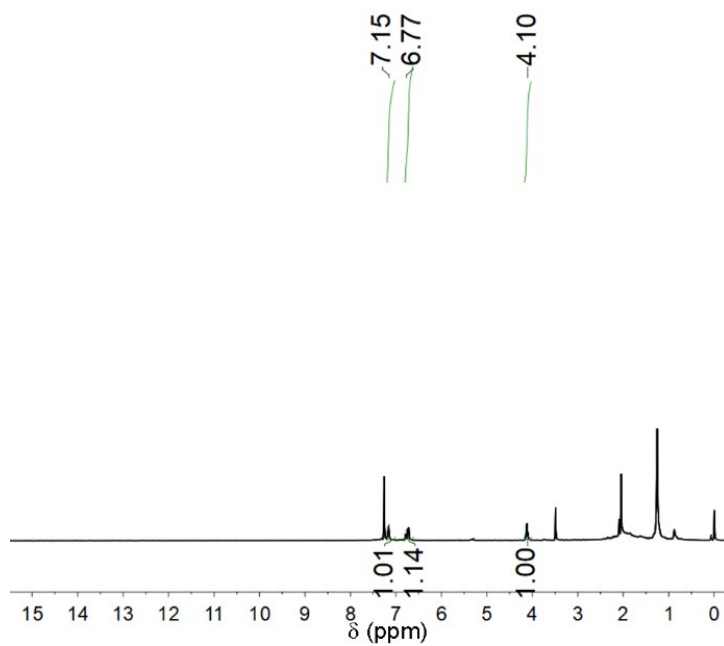

### 4-Aminoanisole

**<sup>1</sup>H NMR (500 MHz, CDCl<sub>3</sub>):** δ 6.77 (d, J = 8.0 Hz, 2H); 6.58 (d, J = 8.0 Hz, 2H); 3.75 (s, 3H); 3.13 (bs, 2H). Isolated yield= 98%.

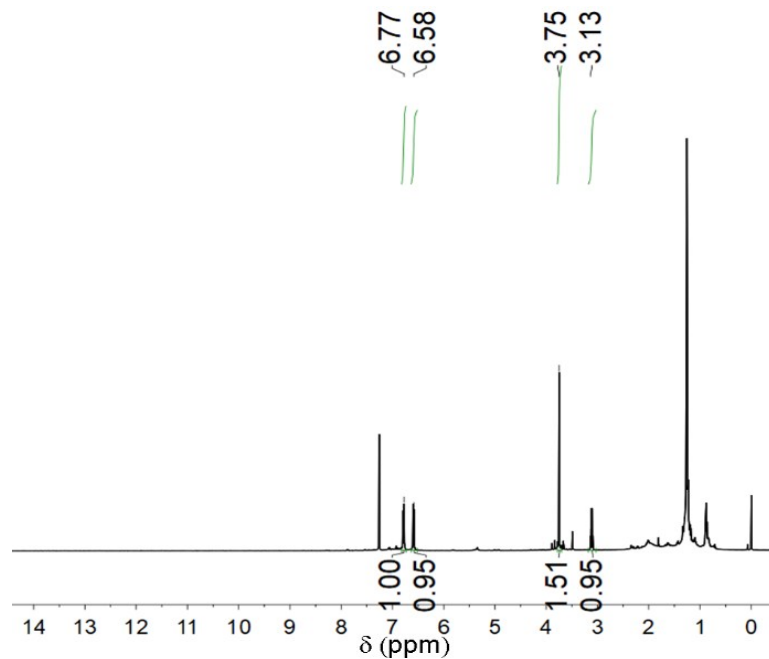

### 1,2,3,4-Tetrahydroquinoline

**<sup>1</sup>H NMR (500 MHz, CDCl<sub>3</sub>):** δ 6.91-6.42 (m, 4H); 3.84 (s, 1H); 3.24 (t, J = 8.0 Hz, 2H); 2.71 (t, J = 8.0 Hz, 2H); 1.89 (q, J = 8.0 Hz, 2H). Isolated yield: Pd@H-N-PCNs, 92%; Pd@B-N-PCNs, 82%; Pd@S-N-PCNs, 78%.

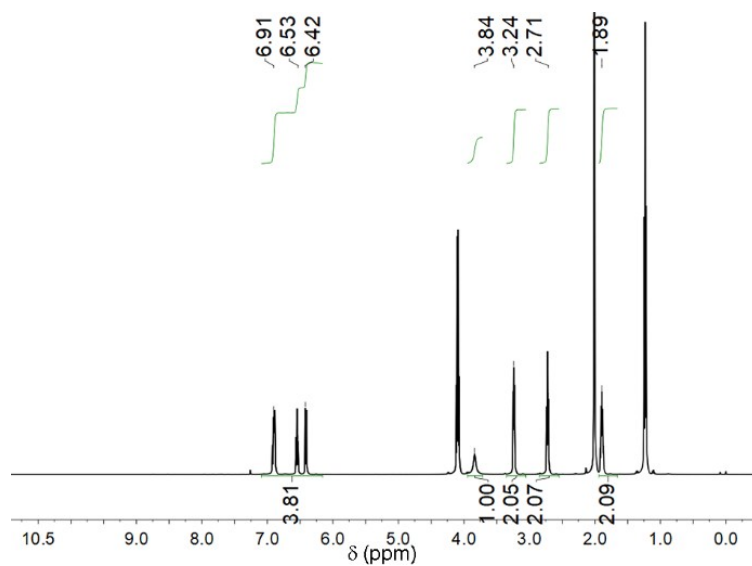

### 5,6,7,8-Tetrahydroquinoline



**<sup>1</sup>H NMR (500 MHz, CDCl<sub>3</sub>):** δ 8.29 (m, 1H); 7.29 (d, J = 9.5 Hz, 1H); 7.00 (m, 1H); 2.88 (t, J = 8.0 Hz, 2H); 2.75 (t, J = 8.0 Hz, 2H); 1.89 (m, 2H); 1.78 (m, 2H). Isolated yield: Pd@H-N-PCNs, 8%; Pd@B-N-PCNs, 18%; Pd@S-N-PCNs, 22%.

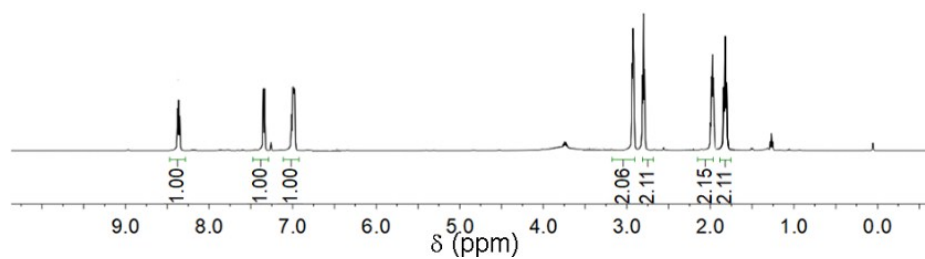

Supplement: c8py01491d1.pdf [file c8py01491d1.pdf]
